# Supplementary material
Source: MDPI journal article supplement (https://www.mdpi.com/2073-4395/9/3/160)
Supplement: s1 [file s1]

## Supplementary Materials

**Table 1.** Fitted coefficients for the organs which were not affected by irrigation treatments.

|                                             | Coefficient/Fitted value                     |                                      |                                            |
|---------------------------------------------|----------------------------------------------|--------------------------------------|--------------------------------------------|
| Thickness of internodes of main stems       | $T_m = 81.0 \pm 2.0 \cdot 10^{-4} \text{ m}$ | $\chi = 45.1 \pm 2.8 \cdot 10^{-2}$  | $\delta = 60.4 \pm 1.4 \cdot 10^{-1}$      |
| Thickness of internodes of branches         | $\alpha = -12.0 \pm 1.0 \cdot 10^{-4}$<br>m  | $b = 8.4 \pm 1.2 \cdot 10^{-4}$<br>m | $c = 15.1 \pm 2.6 \cdot 10^{-4} \text{ m}$ |
| Angles between internodes of the main stems | $d = 131.21 \pm 16.62^\circ$                 | $e = 110.58 \pm 14.32^\circ$         | $f = 110.01 \pm 2.86^\circ$                |
